# Supplementary material for: Novel Latex Microsphere Immunochromatographic Assay for Rapid Detection of Cadmium Ion in Asparagus
Source: MDPI journal article supplement (doi:10.3390/foods11010078), 2021-12-29
Supplement: s1 [file s1]

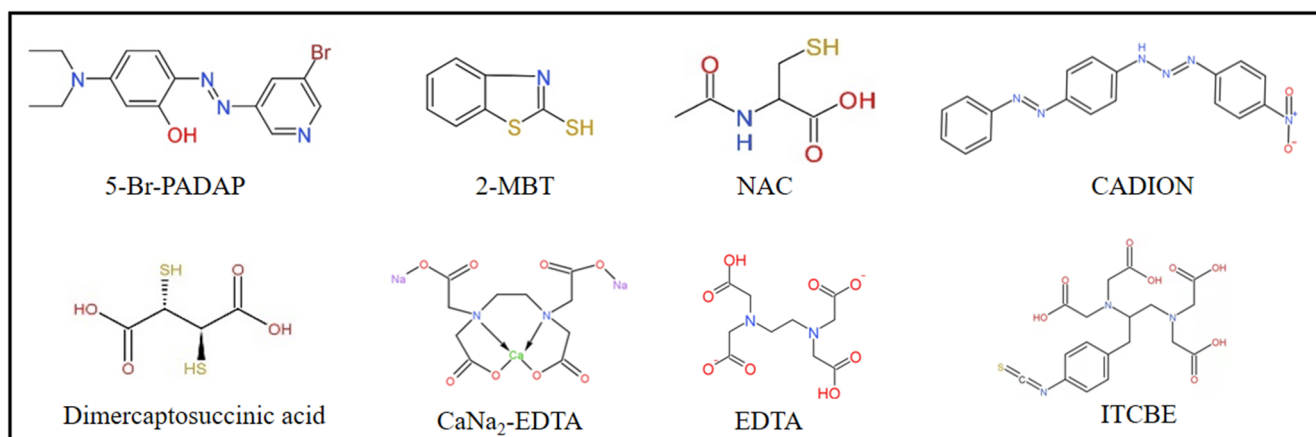

**Figure S1.** Structural formulas of 8 chelating agents, including 5-Br-PADAP, 2-MBT, NAC, CADION, dimercaptosuccinic acid, CaNa<sub>2</sub>-EDTA, EDTA, and ITCBE.

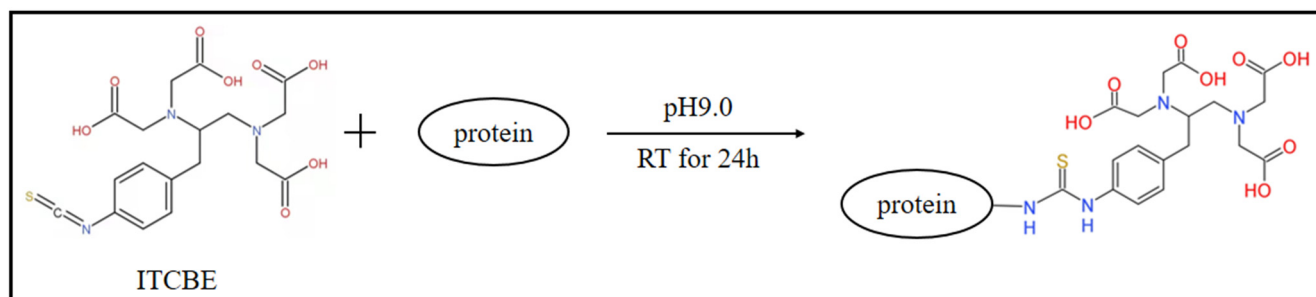

**Figure S2.** Synthetic principle of complete immune antigen for Cd<sup>2+</sup>.

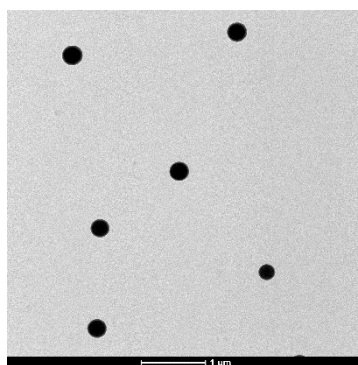

**Figure S3.** SEM image of red latex microspheres.

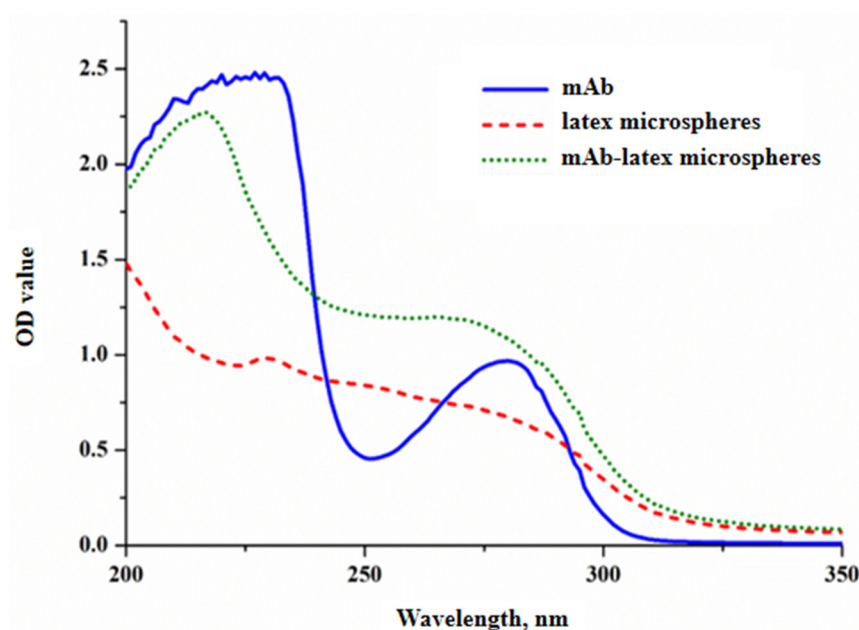

**Figure S4.** UV spectra of mAb, latex microspheres, and mAb-latex microspheres.

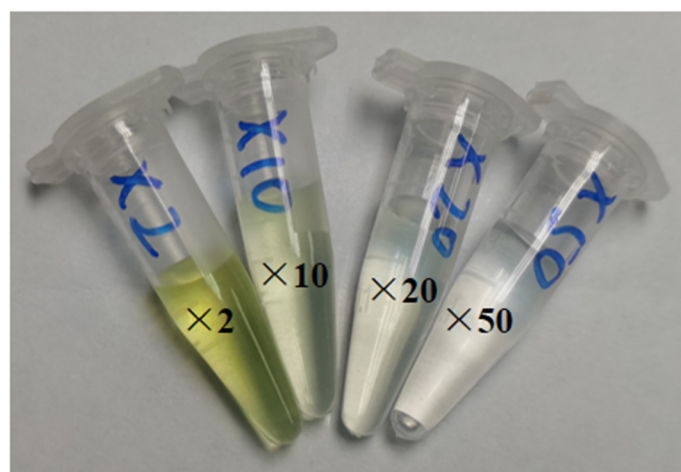

**Figure S5.** Color of pretreated asparagus samples after different dilutions ( $\times 2$ ,  $\times 5$ ,  $\times 10$ , and  $\times 50$ ).

**Table S1.** Reagents and chemicals

| Chemicals                                                                                       | Manufacturers                                | Locations       |
|-------------------------------------------------------------------------------------------------|----------------------------------------------|-----------------|
| $\text{CdCl}_2$                                                                                 | Sinopharm Chemical Reagent Co., Ltd.         | Shanghai, China |
| ITCBE                                                                                           | Dojindo                                      | Kyushu, Japan   |
| $\text{Cd}(\text{NO}_3)_2$                                                                      | National Standard Substances Center of China | Beijing, China  |
| 5-Br-PADAP, 2-MBT, NAC, CADION, dimercaptosuccinic acid, $\text{CaNa}_2\text{-EDTA}$ , and EDTA | Macklin                                      | Shanghai, China |

|                                                                                  |                              |                   |
|----------------------------------------------------------------------------------|------------------------------|-------------------|
| Ovalbumin (OVA), bovine serum albumin (BSA), and keyhole limpet hemocyanin (KLH) | Sigma Co.                    | St Louis, USA     |
| Mouse mAb subtype identification (MAI) ELISA kit                                 | Proteintech                  | Pennsylvania, USA |
| Red carboxyl latex microspheres                                                  | Suzhou Vdo Biotech Co., Ltd. | Suzhou, China     |
| HRP-conjugated antibody and Goat anti-mouse IgG antibody                         | Cellwaylab                   | Luoyang, China    |

---
